# Supplementary material for: Cobalt and nitrogen co-doped mesoporous carbon for electrochemical hydrogen peroxide sensing: the effect of graphitization
Source: Royal Society of Chemistry journal article supplement (doi:10.1039/d0an02473b), 2021-01-01
Supplement: d0an02473b1.pdf [file d0an02473b1.pdf]

## Supporting Information

### **Cobalt and nitrogen co-doped mesoporous carbon for electrochemical hydrogen peroxide sensing: effect of graphitization**

Bin Yan<sup>a,b,c</sup>, Sasa Gu<sup>a,b,c\*</sup>, Yuesong Shen<sup>a,b,c\*</sup>

*a. College of Materials Science and Engineering, Nanjing Tech University, Nanjing  
210009, PR China*

*b. Jiangsu Collaborative Innovation Center for Advanced Inorganic Function  
Composites, Nanjing Tech University, Nanjing 210009, PR China*

*c. Jiangsu National Synergetic Innovation Center for Advanced Materials, Nanjing  
Tech University, Nanjing 210009, PR China*

\*Corresponding author: Prof. Yuesong Shen; PhD. Sasa Gu

**E-mails:** sys-njut@163.com (Yuesong Shen); sasa.gu@njtech.edu.cn (Sasa Gu)

## Results

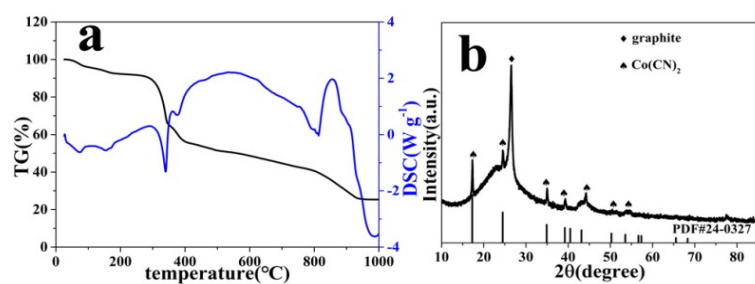

Fig.S1 (a) TGA-DSC curves of sample prepared with EDTA:  $\text{Co}^{2+}$ =1: 0.4; (b) XRD patterns of the sample prepared with EDTA:  $\text{Co}^{2+}$ =1: 0.4 after acid washing.

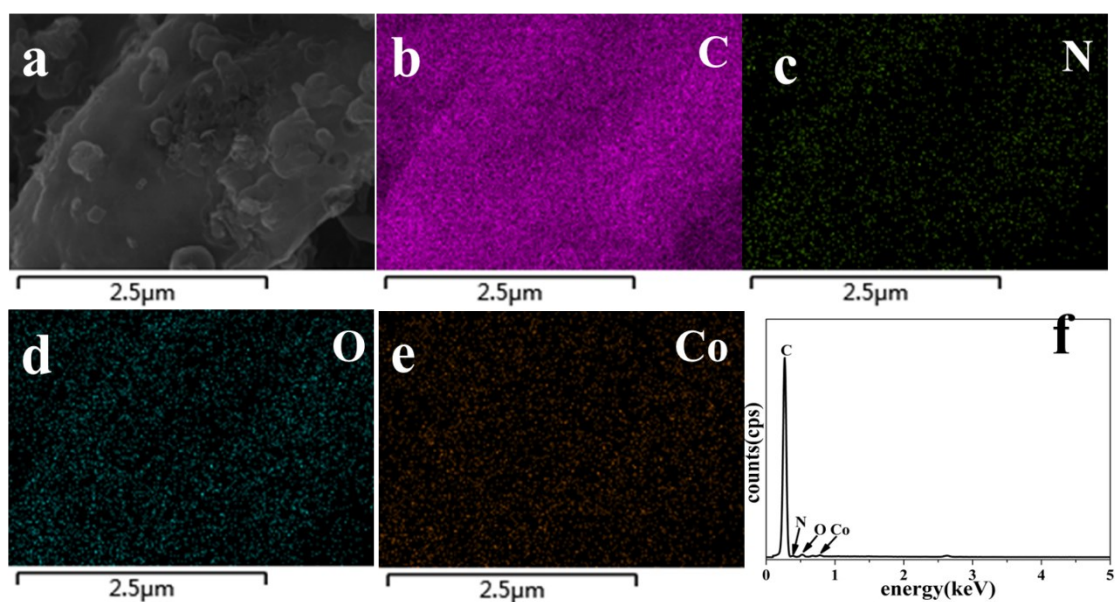

Fig.S2 FE-SEM (a) picture of Co-N/C-950; Elemental mapping images of C (b), N (c), O (d), Co (e) and EDS (f) of Co-N/C-950.

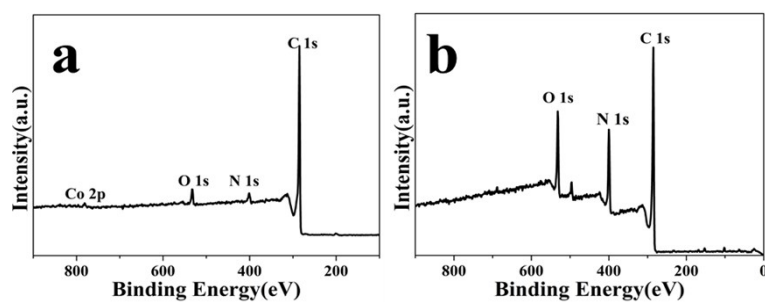

Fig.S3 (a) XPS full-scan spectra of Co-N/C-950; (b) XPS full-scan spectra of N/C; respectively.

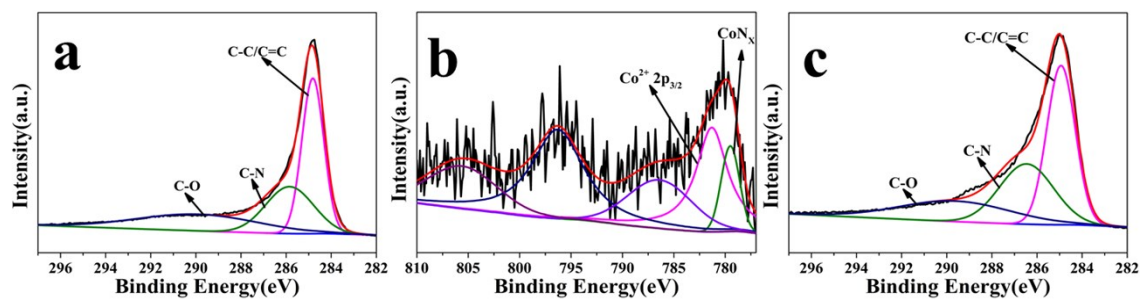

Fig.S4 (a) C 1s XPS spectra, (b) Co 2p XPS spectra of Co-N/C-950, and (c) C 1s XPS spectra of N/C; respectively.

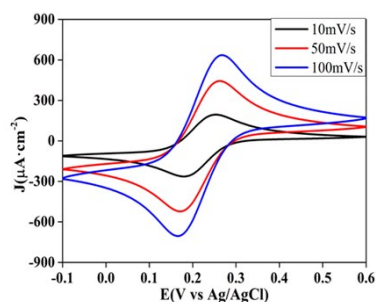

Fig.S5 Cyclic voltammograms of bare electrodes in 3mM  $K_3[Fe(CN)_6]$ +0.1M KCl solution at different scan rates.

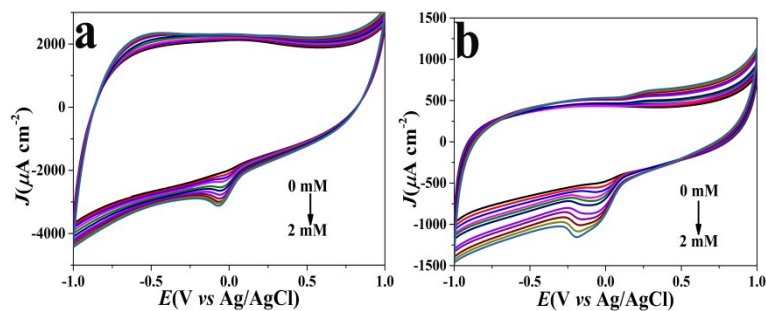

Fig.S6 Cyclic voltammograms (CV) of (a) Co-N/C-750 and (b) Co-N/C-850 on addition of different concentrations of  $H_2O_2$  in  $N_2$ -saturated  $0.1mol\ L^{-1}$  PBS (pH=7.4), potential scan rate  $50mV\ s^{-1}$ .

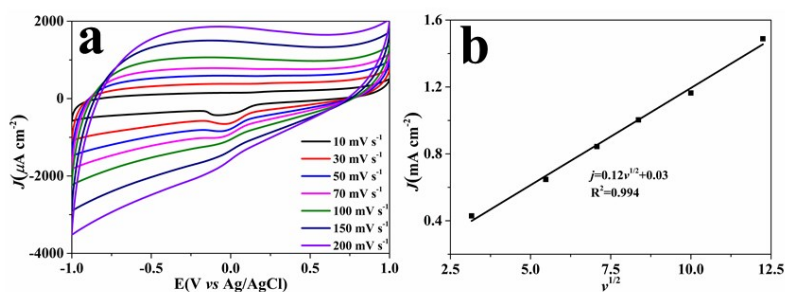

Fig.S7 CV curves (a) of Co-N/C-950 at different scan rates with 1 mM  $H_2O_2$ ; the linear dependence plot of peak currents with scan rate (b).

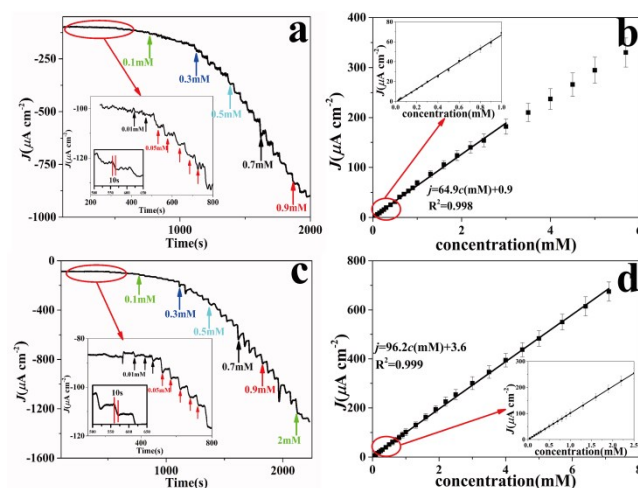

Fig.S8 Amperometric curves of (a) Co-N/C-750, (c) Co-N/C-850 with successive addition of  $\text{H}_2\text{O}_2$  in  $\text{N}_2$ -saturated  $0.1\text{mol L}^{-1}$  PBS (pH=7.4) at the applied potential of -0.1V and -0.15V under constant stirring. The inset pictures in (a) and (c) show the magnified cathodic current response to the low concentrations of  $\text{H}_2\text{O}_2$ . The corresponding calibration curves of (b) Co-N/C-750, (d) Co-N/C-850 toward  $\text{H}_2\text{O}_2$  detection. The error bars represent the standard deviation of three separate measurements on the electrodes.

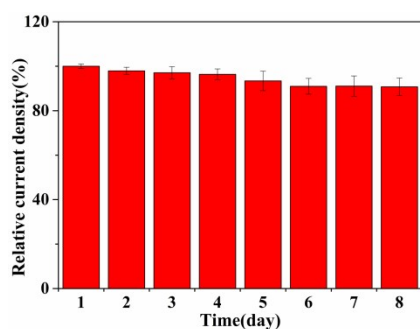

Fig.S9 Long term stability of Co-N/C-950/GCE studied in 1 mM  $\text{H}_2\text{O}_2$  for 8 days.

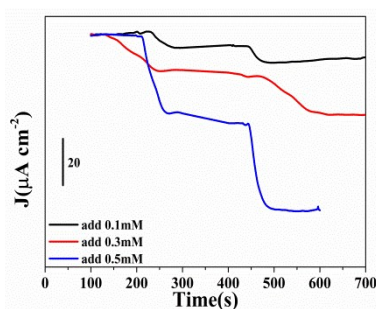

Fig.S10 Co-N/C-950 electrocatalyst for the detection of  $\text{H}_2\text{O}_2$  in fresh water samples with different  $\text{H}_2\text{O}_2$  concentration.

Table S1 ICP-MS data of Co-N/C-x (x=750, 850, 950)

| catalysts  | Co (wt%) |
|------------|----------|
| Co-N/C-750 | 1.93     |
| Co-N/C-850 | 1.94     |
| Co-N/C-950 | 1.44     |

Table S2 the BET data of Co-N/C-950 and N/C.

| catalyst   | Surface area (m <sup>2</sup> g <sup>-1</sup> ) | Pore volume (cm <sup>3</sup> g <sup>-1</sup> ) | Pore diameter (nm) |
|------------|------------------------------------------------|------------------------------------------------|--------------------|
| Co-N/C-950 | 211.35                                         | 0.25                                           | 4.47               |
| N/C        | 463.20                                         | 0.45                                           | 3.84               |

Table S3 the element content of Co-N/C-950 and N/C.

| catalyst   | N<br>(wt.%) | Co<br>(wt.%) | N 1s           |                  |               |                |               |
|------------|-------------|--------------|----------------|------------------|---------------|----------------|---------------|
|            |             |              | Pyridinic<br>N | CoN <sub>x</sub> | Pyrrolic<br>N | Graphitic<br>N | Oxidized<br>N |
| Co-N/C-950 | 6.2         | 0.4          | 13.4           | 5.6              | 28.3          | 17.1           | 35.6          |
| N/C        | 10.4        | -            | 32.5           | -                | 44.8          | 9.3            | 13.4          |
